# Supplementary material for: Antimicrobial and antioxidant activity of Evernia prunastri extracts and their isolates
Source: PubMed Central journal article supplement (PMC8263414; doi:10.1007/s11274-021-03099-y), 2021-07-07
Supplement: 11274_2021_3099_MOESM1_ESM.pdf [file 11274_2021_3099_MOESM1_ESM.pdf]

The yield of different fractions obtained in silica gel column chromatography during the separation of 60% ACN *E. prunastri* extract

| Batch                                            | Fraction | Yield, mg |
|--------------------------------------------------|----------|-----------|
| Eluent: Cyclohexane : acetone / 7:4              |          |           |
| I                                                | 1-6      | 5.0       |
| II                                               | 7-15     | 3.4       |
| III                                              | 16-26    | 12.4      |
| IV                                               | 27-36    | 10.7      |
| V                                                | 37-50    | 10.6      |
| Eluent: Cyclohexane : acetone : methanol / 7:4:1 |          |           |
| VI                                               | 51-68    | 31.8      |
| VII                                              | 69-79    | 31.1      |
| VIII                                             | 80-82    | 44.9      |
| IX                                               | 83-84    | 12.6      |
| Eluent: Cyclohexane: acetone : methanol / 7:4:2  |          |           |
| X                                                | 85       | 0.7       |
| X (E.pr IV)                                      | 85       | 0.7       |
| XI (E.pr V)                                      | 86       | 0.7       |
| XII (E.pr VI)                                    | 87       | 5.0       |
| XIII (E.pr VII)                                  | 88       | 5.8       |
| Eluent: Methanol                                 |          |           |
| XIV                                              | 90       | 11.8      |
| XV                                               | 91       | 224.6     |
